# Supplementary material for: Deconvolution of capacitive and diffusive charge/lithium storage in lyophilized NiCo2S4–NiCo2O4 composite for supercapattery and lithium-ion battery
Source: Royal Society of Chemistry journal article supplement (doi:10.1039/d3nj01663c), 2023-01-01
Supplement: d3nj01663c1.pdf [file d3nj01663c1.pdf]

## Deconvolution of Capacitive and Diffusive Charge/Lithium Storage in Lyophilized $\text{NiCo}_2\text{S}_4\text{-NiCo}_2\text{O}_4$ Composite for Supercapattery and Lithium-ion Battery

Kalidoss Kannadasan<sup>1</sup>, Vaithiyanathan Sankar Devi<sup>1</sup>, Suresh Archana<sup>1</sup>, Paramanandam Thomas<sup>2</sup>  
and Perumal Elumalai<sup>1\*</sup>

<sup>1</sup>Electrochemical Energy Storage Lab, Department of Green Energy Technology, Madanjeet School of Green Energy Technologies, Pondicherry University, Puducherry – 605014, India

<sup>2</sup>Dielectric Materials Division, Central Power Research Institute, Bangalore – 560080, India

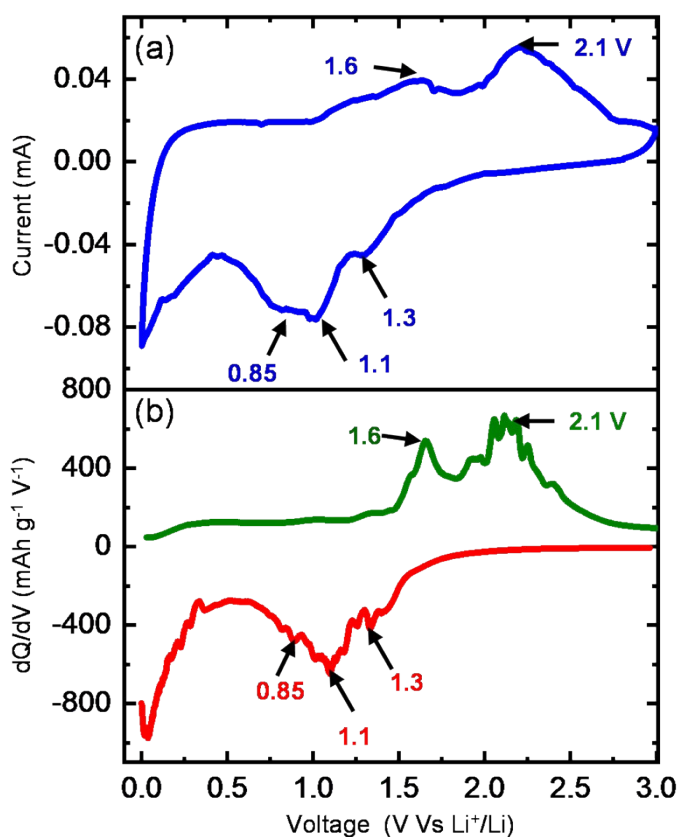

**Fig. S1** (a) Conventional CV at  $0.001 \text{ mV s}^{-1}$  and (dQ/dV) curve of the charge-discharge profile at  $0.2\text{C}$ -rate recorded for the NCS-NCO@GO composite.

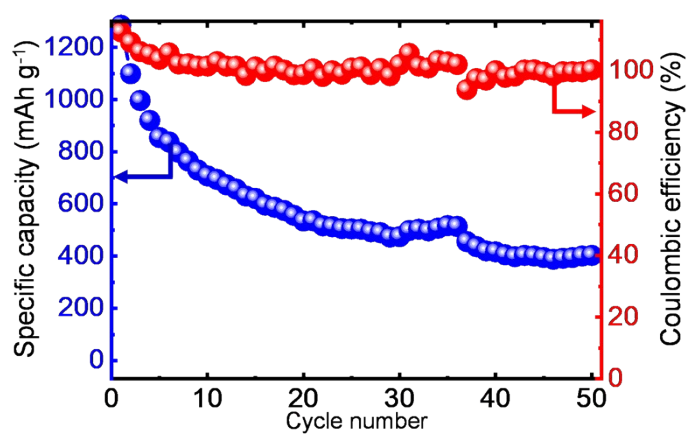

**Fig. S2** Cycle-life data as well as Coulombic efficiency at 0.2C-rate recorded for the half-cell containing the NiCo<sub>2</sub>S<sub>4</sub>-NiCo<sub>2</sub>O<sub>4</sub>@GO composite anode

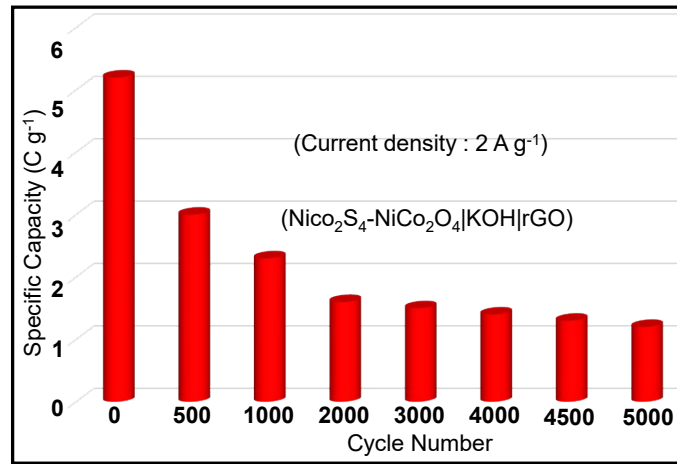

**Fig. S3** Specific capacity vs. cycle number of the supercapattery device (NiCo<sub>2</sub>S<sub>4</sub>-NiCo<sub>2</sub>O<sub>4</sub>|KOH|rGO) recorded at a current density of 2 A g<sup>-1</sup>

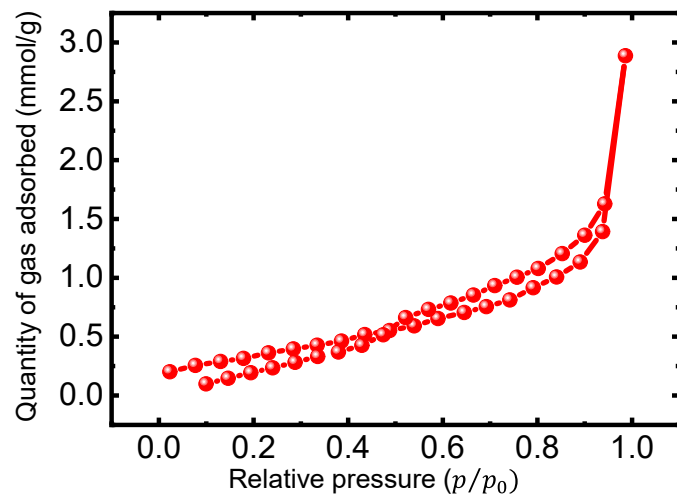

Fig. S4 N<sub>2</sub> adsorption-desorption isotherm recorded for the prepared GO sample.

**Table S1** The ICP-OES analysis results of NCS-NCO composite

| Samples | Ratio<br>n(Ni): n(Co) | Contents of Ni<br>(mg L <sup>-1</sup> ) | Contents of Co<br>(mg L <sup>-1</sup> ) |
|---------|-----------------------|-----------------------------------------|-----------------------------------------|
| NCS-NCO | 1:2                   | 1.00                                    | 1.863                                   |

**Table S2:** Fit values obtained from the Nyquist plots recorded for the CR-2032 coin cell before and after cycle-life tests.

| Cell state             | $R_s$ ( $\Omega$ ) | $R_{ct}$ ( $\Omega$ ) | C (F)                 | W ( $\Omega$ s <sup>-1/2</sup> ) |
|------------------------|--------------------|-----------------------|-----------------------|----------------------------------|
| Before cycle-life test | 7.9                | 86                    | $2.76 \times 10^{-6}$ | 276                              |
| After cycle-life test  | 74.6               | 215                   | $1.72 \times 10^{-6}$ | 408                              |
